# Supplementary material for: Anti-Amyloidogenic Effects of Asarone Derivatives From Perilla frutescens Leaves Against Beta-Amyloid Aggregation and Nitric Oxide Production
Source: Molecules. 2019 Nov 25;24(23):4297. doi: 10.3390/molecules24234297 (PMC6930631; doi:10.3390/molecules24234297)
Supplement: Supplementary file 1 [file molecules-24-04297-s001.pdf]

## Supplementary Materials

# Anti-Amyloidogenic Effects of Asarone Derivatives From *Perilla frutescens* Leaves Against Beta-Amyloid Aggregation and Nitric Oxide Production

Jae Eun Lee <sup>1,†</sup>, Nayeon Kim <sup>1,†</sup>, Ji Yun Yeo <sup>1</sup>, Dae-Gun Seo <sup>1</sup>, Sunggun Kim <sup>1</sup>, Jae-Sun Lee <sup>1</sup>, Kwang Woo Hwang <sup>2</sup> and So-Young Park <sup>1,\*</sup>

<sup>1</sup> College of Pharmacy, Dankook University, 119 Dandae-ro, Dongnam-gu, Cheonan-si, Chungnam 31116, Republic of Korea; jnlee88@korea.kr (J.E.L.); nayeon02200@gmail.com (N.K.); dankook\_jjiyun@naver.com (J.Y.Y.); gun3691@naver.com (D.-G.S.); jejuui@hanmail.net (S.K.); sailious34@naver.com (J.-S.L.)

<sup>2</sup> College of Pharmacy, Chung-Ang University, 84 Heukseok-ro, Dongjak-gu, Seoul 06974, Republic of Korea; khwang@cau.ac.kr

† These authors contributed equally to this work.

\* Correspondence: soypark23@dankook.ac.kr, Tel.: +82-41-550-1434, Fax: +82-41-559-7899

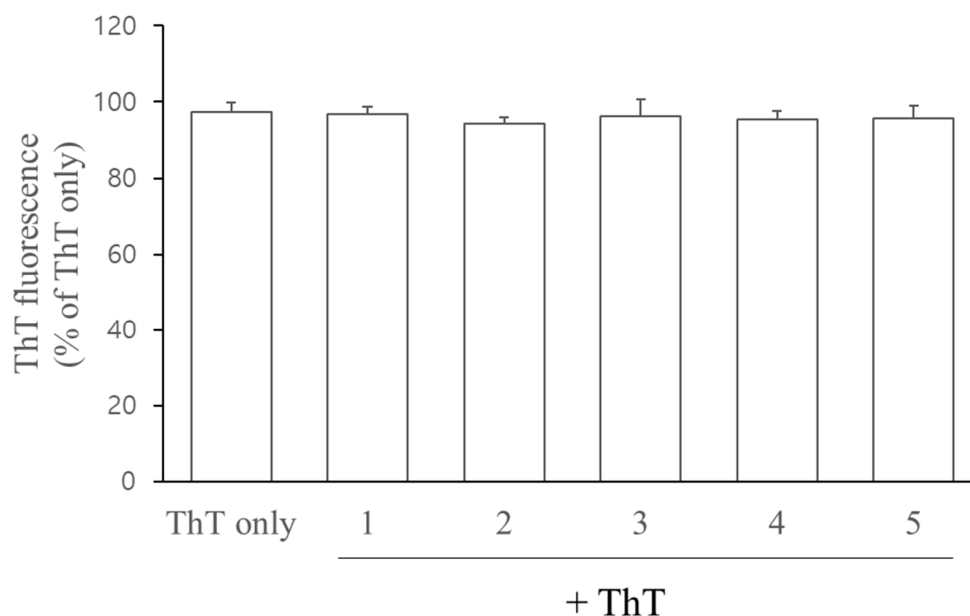

**Supplementary Figure 1.** Direct effect of asarone derivatives on Th T fluorescence. In order to determine quenching effect of asarone derivatives asarone derivatives were incubated with Th T without A $\beta$  and the fluorescence values were determined. The Th T fluorescence values were compared to Th T only.

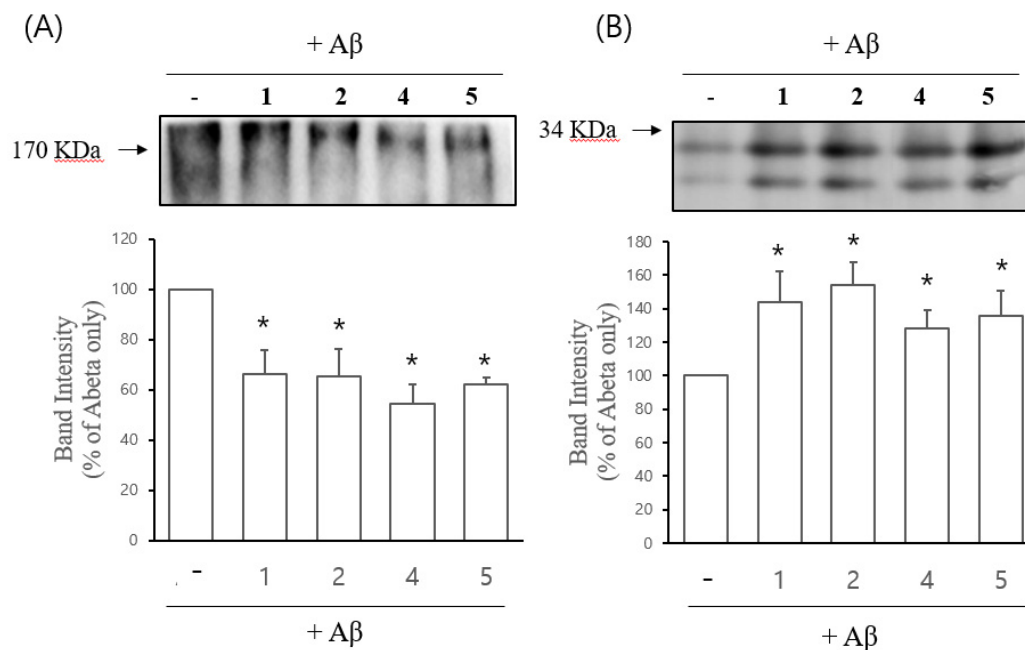

**Supplementary Figure 2.** The effect of asarone derivatives on A $\beta$  aggregation determined by western blot analysis. The western blot analysis with native gels using anti-A $\beta$ (1–20) antibody and the band intensity was compared to A $\beta$  only samples (Due to the lack of amount, compound 3 was excluded from this experiment). \*  $p < 0.05$  compared to A $\beta$  only.
